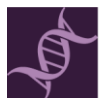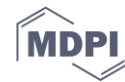

1 Article

# 2 Transcriptional differences of lipid-metabolizing enzymes in 3 sebocytes derived from sebaceous glands of the skin and pre- 4 putial glands

5 Katharina Klas<sup>1,2</sup>, Dragan Copic<sup>1,2</sup>, Martin Direder<sup>1,2</sup>, Maria Laggner<sup>1,2</sup>, Patricia S Prucksamas<sup>3,4</sup>, Florian Gruber<sup>3</sup>,  
6 Hendrik Jan Ankersmit<sup>1,2</sup> and Michael Mildner<sup>3,\*</sup>

7 <sup>1</sup> Laboratory for Cardiac and Thoracic Diagnosis, Regeneration and Applied Immunology, Department of  
8 Thoracic Surgery, Medical University of Vienna, Vienna, Austria  
9 <sup>2</sup> Aposcience AG, Vienna, Austria  
10 <sup>3</sup> Department of Dermatology, Medical University of Vienna, Vienna, Austria  
11 <sup>4</sup> IMC University of Applied Sciences, Krems, Austria  
12 \* [michael.mildner@meduniwien.ac.at](mailto:michael.mildner@meduniwien.ac.at)

13 **Abstract:** Sebaceous glands are adnexal structures, which critically contribute to skin homeostasis  
14 and the establishment of a functional epidermal barrier. Sebocytes, the main cell population found  
15 within the sebaceous glands, are highly specialized lipid-producing cells. Sebaceous gland-resem-  
16 bling tissue structures are also found in male rodents in form of preputial glands. Similar to seba-  
17 ceous glands, they are composed of lipid-specialized sebocytes. Due to a lack of adequate organ  
18 culture models for skin sebaceous glands and the fact that preputial glands are much larger and  
19 easier to handle, previous studies have used preputial glands as a model for skin sebaceous glands.  
20 Here, we compared both types of sebocytes, using a single cell RNA sequencing approach, to un-  
21 ravel potential similarities and differences between the two sebocyte populations. In spite of com-  
22 mon gene expression patterns due to general lipid-producing properties, we found significant dif-  
23 ferences in the expression levels of genes encoding enzymes involved in the biogenesis of special-  
24 ized lipid classes. Specifically, genes critically involved in the mevalonate pathway, including squalene  
25 synthase, as well as the sphingolipid salvage pathway, such as ceramide synthase, (acid) sphin-  
26 gomyelinase or acid and alkaline ceramidases, were significantly less expressed by preputial gland  
27 sebocytes. Together, our data revealed tissue-specific sebocyte populations, indicating major devel-  
28 opmental, functional as well as biosynthetic differences between both glands. The use of preputial  
29 glands as surrogate model to study skin sebaceous glands is therefore limited, and major differences  
30 between both glands need to be carefully considered before planning an experiment.

31 **Keywords:** Skin; Sebaceous Gland; Preputial Gland; scRNA-Sequencing; Lipid; Sebocyte Differen-  
32 tiation, Bioactive Lipid Synthesis

33 **Citation:** Klas, K.; Copic, D.;  
34 Direder, M. Transcriptional differ-  
35 ences of lipid-metabolizing enzymes  
36 in sebocytes derived from sebaceous  
37 glands of the skin and preputial  
38 glands. *Int. J. Mol. Sci.* 2021, 22, x.  
39 <https://doi.org/10.3390/xxxxx>

40 Academic Editor: [Firstname Last-](#)  
41 [name](#)

42 Received: date  
43 Accepted: date  
44 Published: date

45 **Publisher's Note:** MDPI stays neu-  
46 tral with regard to jurisdictional  
47 claims in published maps and institu-  
48 tional affiliations.

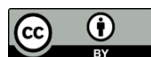

49 **Copyright:** © 2021 by the authors.  
50 Submitted for possible open access  
51 publication under the terms and  
52 conditions of the Creative Commons  
53 Attribution (CC BY) license  
54 (<https://creativecommons.org/licenses/by/4.0/>).

## 33 1. Introduction

34 The skin provides a variety of adnexal structures including the pilosebaceous unit,  
35 which comprises the hair follicle, arrector pili muscle and the sebaceous gland. The latter  
36 contributes critically to epidermal homeostasis and barrier function by secreting lipids  
37 and enzymes[1]. Sebaceous gland (SG) development is tightly coordinated with the for-  
38 mation of the hair follicle (HF)[2], [3]. The most prominent functions of SGs are the pro-  
39 duction of sebum and the trafficking of lipids and lipid-soluble factors to the skin sur-  
40 face[4]. Sebum mainly consists of non-polar lipids including triglycerides, fatty acids, wax  
41 esters, cholesterol and squalene[5]. Sebum production follows a highly specific program  
42 where pre-sebocytes undergo a maturation and differentiation process. During this dif-  
43 ferentiation program sebocytes (SEB) from the outer epithelial layer of the sac-like gland  
44 structure move towards the lumen to the hair shaft, ultimately leading to cell death. The  
45 amount of intracellular lipids constantly increases during differentiation until the so-

46 called 'necrotic zone' is reached and terminally differentiated sebocytes undergo mem-  
47 brane lysis and nuclear degradation, thereby releasing their cellular content[5]–[7]. SG lin-  
48 eage differentiation relies on a well-balanced equilibrium of canonical Wnt/ $\beta$ -catenin and  
49 c-myc/Hedgehog signaling. SEB progenitors usually express high levels of  $\beta$ -catenin.  
50 Lymphoid enhancer binding factor-1 (*Lef1*) serves as essential regulatory factor control-  
51 ling lineage differentiation towards either HF or SG cells [8]–[10]. Terminally differenti-  
52 ated SEB express high levels of stearoyl-CoA desaturase 1 (*Scd1*) and peroxisome prolifer-  
53 ator-activated receptor  $\gamma$  (*Pparg*). Both factors are known to critically contribute to SG  
54 differentiation and the formation of a functional epidermal barrier by regulating keratino-  
55 cyte differentiation [10], [11]. SG function and lipid composition have been linked to sever-  
56 al inflammatory dermatoses including for example acne vulgaris, atopic dermatitis, psor-  
57 iasis, rosacea and seborrheic dermatitis with tremendously changed levels of squalene  
58 and bioactive sphingolipids such as ceramide (CER) [12]–[21].

59 Squalene represents one of the most abundant lipid components found in human  
60 sebum [22]. It serves as precursor for cholesterol which is lastly synthesized by epidermal  
61 keratinocytes rather than SEB as they lack the necessary enzymes required for the final  
62 conversion steps [12], [23], [24]. Squalene synthesis via the mevalonate/isoprenoid biosyn-  
63 thetic pathway is initiated by  $\beta$ -hydroxy- $\beta$ -methylglutaryl-CoA (HMG-CoA) synthase  
64 (*Hmgcs1*), converting acetoacetyl-CoA to HMG-CoA, which in turn is further processed to  
65 mevalonate by HMG-CoA reductase (*Hmgcr*). Mevalonate is then converted to geranyl  
66 diphosphate, which serves as substrate for farnesyl diphosphate synthase (*Fdps*) to syn-  
67 thesize farnesyl diphosphate. At this point further lipid synthesis is either dedicated to  
68 cholesterol synthesis via the sterol branch or the non-sterol branch including isoprenyla-  
69 tion of proteins as well as synthesis of ubiquitin, heme and dolichols. Squalene synthase  
70 (*Fdft1*) is essential for squalene synthesis from farnesyl diphosphate thereby catalyzing  
71 the first step of the cholesterol-specific sterol branch of the isoprenoid biosynthetic path-  
72 way [25]–[29].

73 Biologically active sphingolipids, including sphingomyelin, ceramide and sphingo-  
74 sine 1-phosphate, have received increasing attention over the past years with regard to  
75 their critical role in signaling cascades, regulating a vast array of cellular functions [30].  
76 Furthermore, these lipids are important for the establishment of a functional skin barrier  
77 [17], [18], [30]–[35]. Under homeostatic conditions these lipids are formed via the sphin-  
78 gomyelinase pathway by *de novo* synthesis or by the recycling of sphingosine via the sal-  
79 vage pathway [36]–[38]. Depending on external stimuli, this sphingolipid synthesis favors  
80 different lipid products. UV-radiation, chemotherapy and death receptor ligation trigger  
81 CERs and sphingosine synthesis functioning as potent pro-apoptotic mediators [30], [39].  
82 In contrast, growth factors (e.g. platelet-derived growth factor, insulin-like growth factor,  
83 vascular endothelial growth factor), cytokines such as TNF and interleukin-1, hypoxia and  
84 immune complexes promote sphingosine 1-phosphate synthesis [30]. To counteract the  
85 pro-apoptotic functions of CER, cells can evade CER-induced cell death by its conversion  
86 to non-apoptotic metabolites such as sphingosine 1-phosphate [40]. Sphingosine 1-phos-  
87 phate and its synthesizing enzyme sphingosine kinase 1 were not only proven to promote  
88 cell survival and proliferation, but also seem capable of actively inhibiting CER-mediated  
89 apoptosis[41]. The initial step of the *de novo* sphingolipid synthesis pathway occurs in the  
90 endoplasmic reticulum where serine palmitoyltransferase (*Sptlc1*) condensates serine and  
91 palmitoyl-CoA [36]. After several consecutive enzymatic intermediate steps, CER is  
92 formed which can be further trafficked to the Golgi apparatus where it may be converted  
93 into sphingomyelin by sphingomyelin synthases (*Sgms1*) or into glucosylceramide by glu-  
94 cosylceramide synthase (*Ugcg*) and subsequently to glycosphingolipids [37], [42]. The  
95 sphingomyelinase pathway is initiated with hydrolysis of sphingomyelin by sphingomy-  
96 elinases (SMases; *Smpd1*), resulting in CER generation [37]. CER is subsequently con-  
97 verted into sphingosine by pH-dependent ceramidases including the alkaline ceramidase  
98 *Acer1*, neutral ceramidase *Asah2* and acid ceramidase *Asah1* [37], [43], [44]. Sphingosine is  
99 further processed to sphingosine-1-P by a sphingosine kinase (*Sphk1*) [38]. In the salvage

100 pathway, recycling of pre-formed sphingolipids via ceramide synthase (*Cers4*) results in  
101 the degradation of sphingosine to CER [37], [38].

102 Despite advances in *in vitro* approaches using sebocyte cell lines, such as SZ95, Seb-  
103 E6E7 and SEB-1, the major drawback of SG studies is the lack of adequate organ culture  
104 models, which are indispensable to comprehensively investigate sebaceous cell differen-  
105 tiation, lipid production and extrusion [45]–[47]. Since preputial glands (PGs) are signifi-  
106 cantly larger and easier to obtain, they have previously been used as a surrogate model  
107 for skin SGs [7], [48], [49]. PGs are specialized sebaceous-like glands found in male ro-  
108 dents. Several studies investigating skin sebocytes have been built on data obtained from  
109 PG sebocytes [50]–[54]. Here we investigated the differences between SG- and PG-derived  
110 sebocytes on a single-cell level to elaborate their suitability as model for skin sebaceous  
111 glands.

## 112 2. Results

### 113 2.1 Significant differences in gene expression between sebocytes derived from skin SGs and PGs

114 Since PGs have previously been used as model for skin SGs, we wanted to investigate  
115 their differences and similarities in more detail. Hematoxylin and Eosin (H&E) staining  
116 (Figure 1A) and immunofluorescence (IF) (Figure 1B) were performed to obtain an over-  
117 view of potential morphological differences between SEB derived from skin (sSEB) and  
118 PG (pSEB) (Figure 1A and B). Both, H&E staining and IF for Stearoyl-CoA desaturase  
119 (*Scd1*) revealed high morphological similarities between SEB of the glands of both tissue  
120 types. Skin sebocytes were only detected within the sebaceous gland in close proximity to  
121 a hair shaft. Preputial gland sebocytes were extensively distributed throughout the gland.  
122 Despite the larger size and therewith resulting higher numbers of SEB within the PG,  
123 overall morphology highly resembles sSEB. In both tissues, the gradual differentiation of  
124 SEB from less differentiated, nucleated SEB on the outer edges of the SG and further away  
125 from the lumen of the PG was observed. In SG as well as PG, nuclear degradation was  
126 detected in SEB closer to the hair canal or the glandular lumen, respectively, indicating a  
127 mature or fully differentiated state of the SEB. Size and gross shape of SEB was similar in  
128 both tissues.

129 To decipher transcriptional differences between sSEB and pSEB, we performed  
130 scRNAseq. Unbiased analysis of the data set and cluster generation revealed comparable  
131 cell type composition in both samples (Figure 1C). All populations were identified based  
132 on computed cluster-specific markers and well-established marker genes (Supplementary  
133 Figure 1). Cell clusters were identified as keratinocytes, fibroblasts, immune cells, endo-  
134 thelial cells, muscle and smooth muscle cells and SEB. Interestingly, the relative numbers  
135 of the different cell types varied between skin and PG (Figure 1D). Whereas PGs contained  
136 fewer keratinocytes, relative numbers of immune cells and SEB were higher in PGs. Al-  
137 though SEB clustered together in skin and PGs (Figure 1C, purple), a striking difference in  
138 cluster shape was observed, already indicating differences in gene expression.

139 For a more detailed characterization, we subclustered SEB yielding five distinct SEB sub-  
140 populations in skin SGs and three in PGs (Figure 2A). Closer characterization of the sub-  
141 populations present in the skin showed high expression levels of hair follicle (HF)-associ-  
142 ated genes, such as *Krt27*, *Krt17*, *Hoxc13* and *Wnt5a* in the major three subpopulations  
143 (HF/SEB1, HF/SEB2, HF/SEB3) (Supplementary Figure 2) [55]–[61]. The two main clusters  
144 in PG were identified as early SEB and late SEB, and were both also found in the skin,  
145 though at significantly smaller numbers. The HF/SEB3 cluster was present in both skin  
146 and PG (Figure 2B). A total number of 663 genes was differentially expressed between  
147 sSEB and pSEB with a fold change cutoff greater than 1.5 or smaller than 0.6 (452 genes  
148 upregulated and 211 genes downregulated in skin) (Figure 2C). To analyze transcriptional  
149 differences and consequently potential variations in function we performed gene ontol-  
150 ogy (GO) term enrichment analyses based on computed marker gene lists of sSEB and  
151 pSEB. sSEB GO terms were highly related to skin-specific functions such as epidermal

152 development, epithelial cell differentiation, cell junction and cell-cell adhesion processes  
153 as well as gland development (Figure 2D).

154 Contrary, genes highly expressed in pSEB were strongly related to lipid specific GO  
155 terms involving lipid-binding and -metabolic processes. Furthermore, genes involved in  
156 steroid metabolic processes were enriched in pSEB (Figure 2D). In addition, GO term anal-  
157 yses indicated that the sSEB cluster represented a mixture of lipid-specialized SEB and HF  
158 cells. Closer analysis of key genes associated with the previously identified GO terms  
159 showed that the HF/SEB3 in skin showed high expression levels of genes involved in skin-  
160 specific functions while HF/SEB3 in PG exhibited little to no expression of those genes but  
161 high expression of lipid-associated genes (Figure 2E). Together, our data suggest remark-  
162 able tissue-specific differences between sSEB and pSEB in gene expression and conse-  
163 quently indicates different SEB function.  
164

### 165 2.3 sSEB and pSEB exhibit significant differences in their differentiation program

166 As our previous results suggest a high tissue-specific gene expression profile, we first  
167 compared the differentiation programs engaged by sSEB and pSEB. Analyses of key genes  
168 involved in the regulation of sebaceous cell differentiation revealed that the HF-associated  
169 clusters, HF/SEB1, HF/SEB2 and HF/SEB3, as well as early SEB in the skin exhibited high  
170 expression levels of  $\beta$ -catenin (*Ctnnb1*) (Figure 3A). In addition, the Wnt/ $\beta$ -catenin down-  
171 stream effector gene *Lef1*, which promotes differentiation towards HF cells was strongly  
172 expressed in HF/SEB1 and HF/SEB2 clusters (Figure 3B) [9], [10]. In contrast, only early  
173 and late pSEB expressed high levels of  $\beta$ -catenin (*Ctnnb1*) but no *Lef1* (Figure 3A, B). This  
174 finding is concomitant with previously published studies describing canonical Wnt/ $\beta$ -  
175 catenin signaling as critical for cell fate decision towards either HF or SG in the skin [8],  
176 [10], [62]. Both, early and late SEB in skin and PGs showed high expression levels of *Pparg*  
177 (Figure 3C) and *Plin2* (Figure 3D) compared to HF-associated clusters (Figure 3D), indi-  
178 cating an advanced SEB differentiation stage. We furthermore performed pseudotime tra-  
179 jectory analysis of skin HF-keratinocytes (HF-KC), identified by HF-associated genes  
180 (Supplementary Fig. 3A,B) and sSEB (Figure 3E) [63]. We included HF-KCs as the HF-  
181 associated SEB cluster indicated a potential cell fate decision towards differentiated  
182 keratinocytes with lineage affinity towards hair follicle keratinocytes (HF/Diff KC). The  
183 starting point (green) was set at *Blimp1*<sup>+</sup> (*Prdm1*) expressing stem cells (Figure 3E, Supple-  
184 mentary Figure 3C). The first branching point (white circle) after pseudotime start (green  
185 circle) directed cell differentiation either into SEB or HF cells. Within the HF/Diff KC clus-  
186 ter, there were two additional fate decision checkpoints, indicating differentiation steps  
187 within the HF cluster into different KC subpopulations found in HFs. Once the cell fate  
188 decision was made towards SEB, there was only one differentiation end point (marked as  
189 red circle). For pSEB, such trajectory analysis was not computed because stem cells or  
190 precursors could not be mapped with high accuracy (Supplementary Fig. 3D). To sum up,  
191 these findings clearly indicate that sSEB and pSEB undergo strikingly dissimilar differen-  
192 tiation programs to reach a lipid-specialized and late differentiated state.  
193  
194

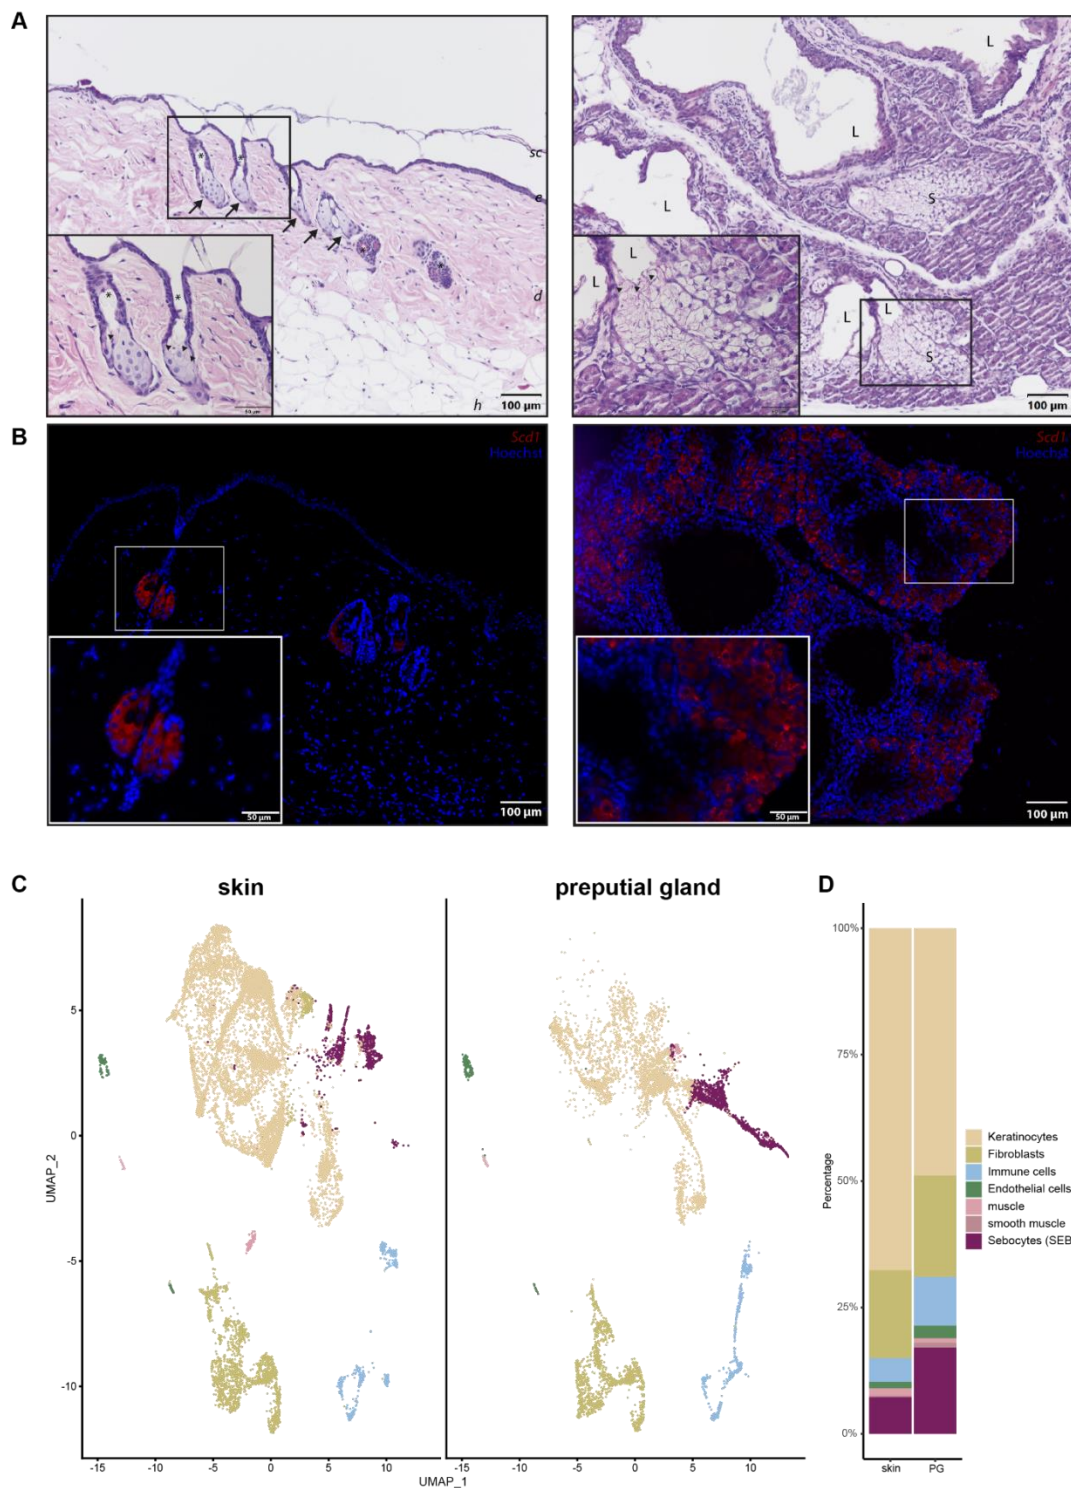

**Figure 1.** Comparison of skin and preputial gland sebocytes. (A) Hematoxylin and eosin staining of a skin biopsy (left panel) and a preputial gland (right panel). Arrows indicate sebaceous glands in close proximity to hair shafts marked by asterisks. Arrowheads indicate differentiated sebocytes with degenerated nuclei, facing the lumen of either the hair shaft or the lumen of the preputial gland; Scale bar = 100µm, 50µm in insert; *sc*: stratum corneum; *e*: epidermis; *d*: dermis; *h*: hypodermis; *L*: lumen of the preputial gland; *S*: sebocytes; (B) Representative immunofluorescence labelling of *Scd1*<sup>+</sup> sebocytes in the skin (left panel) and the preputial gland (right panel); scale bar = 100µm, 50µm in insert. Tissues of n = 3 respectively. (C) UMAP-plots comparing cells of skin biopsies (n=3) and preputial glands (n=3), split by tissue, identifying keratinocytes, fibroblasts, immune cells, endothelial cells, muscle and smooth muscle cells and sebocytes (SEB). (D) Bar plot indicating relative numbers of cell populations identified within the skin and preputial gland.

195

196

197

198

199

200

201

202

203

204

205

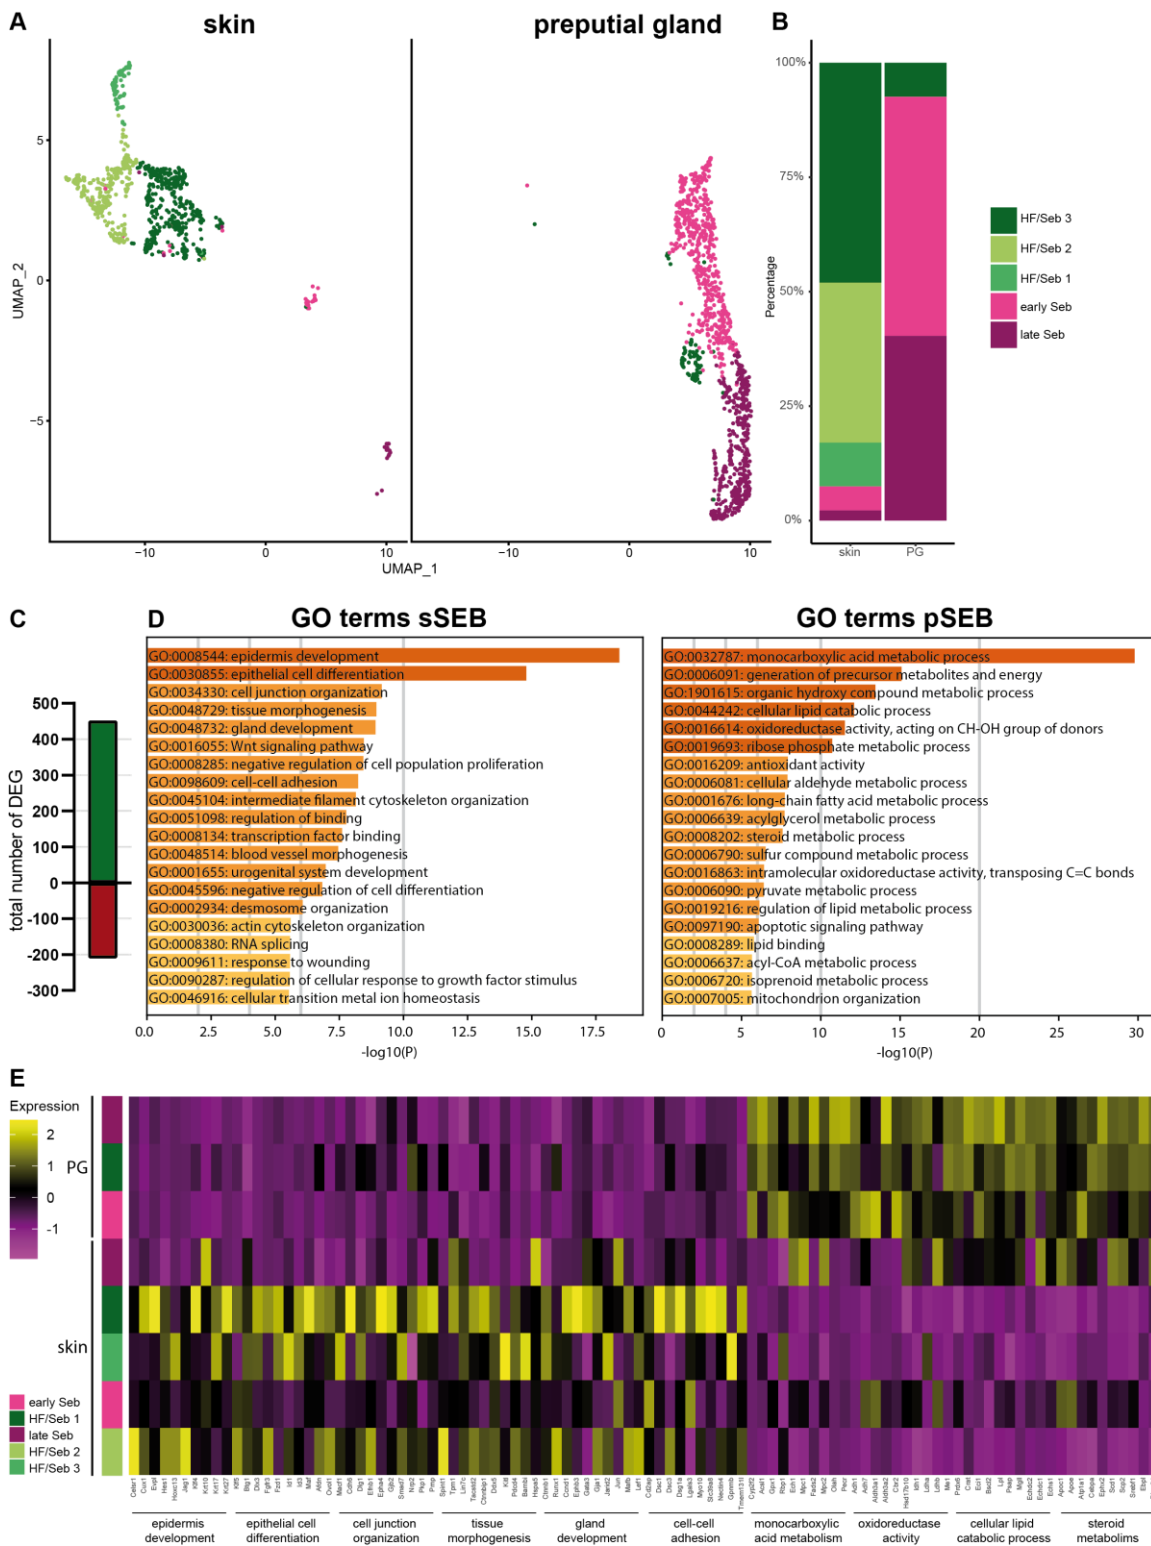

206

207 **Figure 2.** Subclustering of sebocytes and Gene Ontology analysis (A) Analysis of the sebocyte subcluster identified five distinct  
 208 subtypes in UMAP-plot. Subclusters were identified as HF/SEB 1, HF/SEB 2, HF/SEB 3, early SEB and late SEB. (B) Barplot indicates  
 209 relative cell numbers present within each sebocyte subcluster. (C) Barplot shows the total number of differentially expressed genes  
 210 of total sSEB compared to total pSEB. (D) Gene Ontology (GO) term analysis results using Metascape. Genes with differential  
 211 expression fold change of >1.5 or <0.6 were assigned to GO terms. (E) Heatmap showing expression levels of genes associated with  
 212 distinct GO terms in the different SEB subcluster.

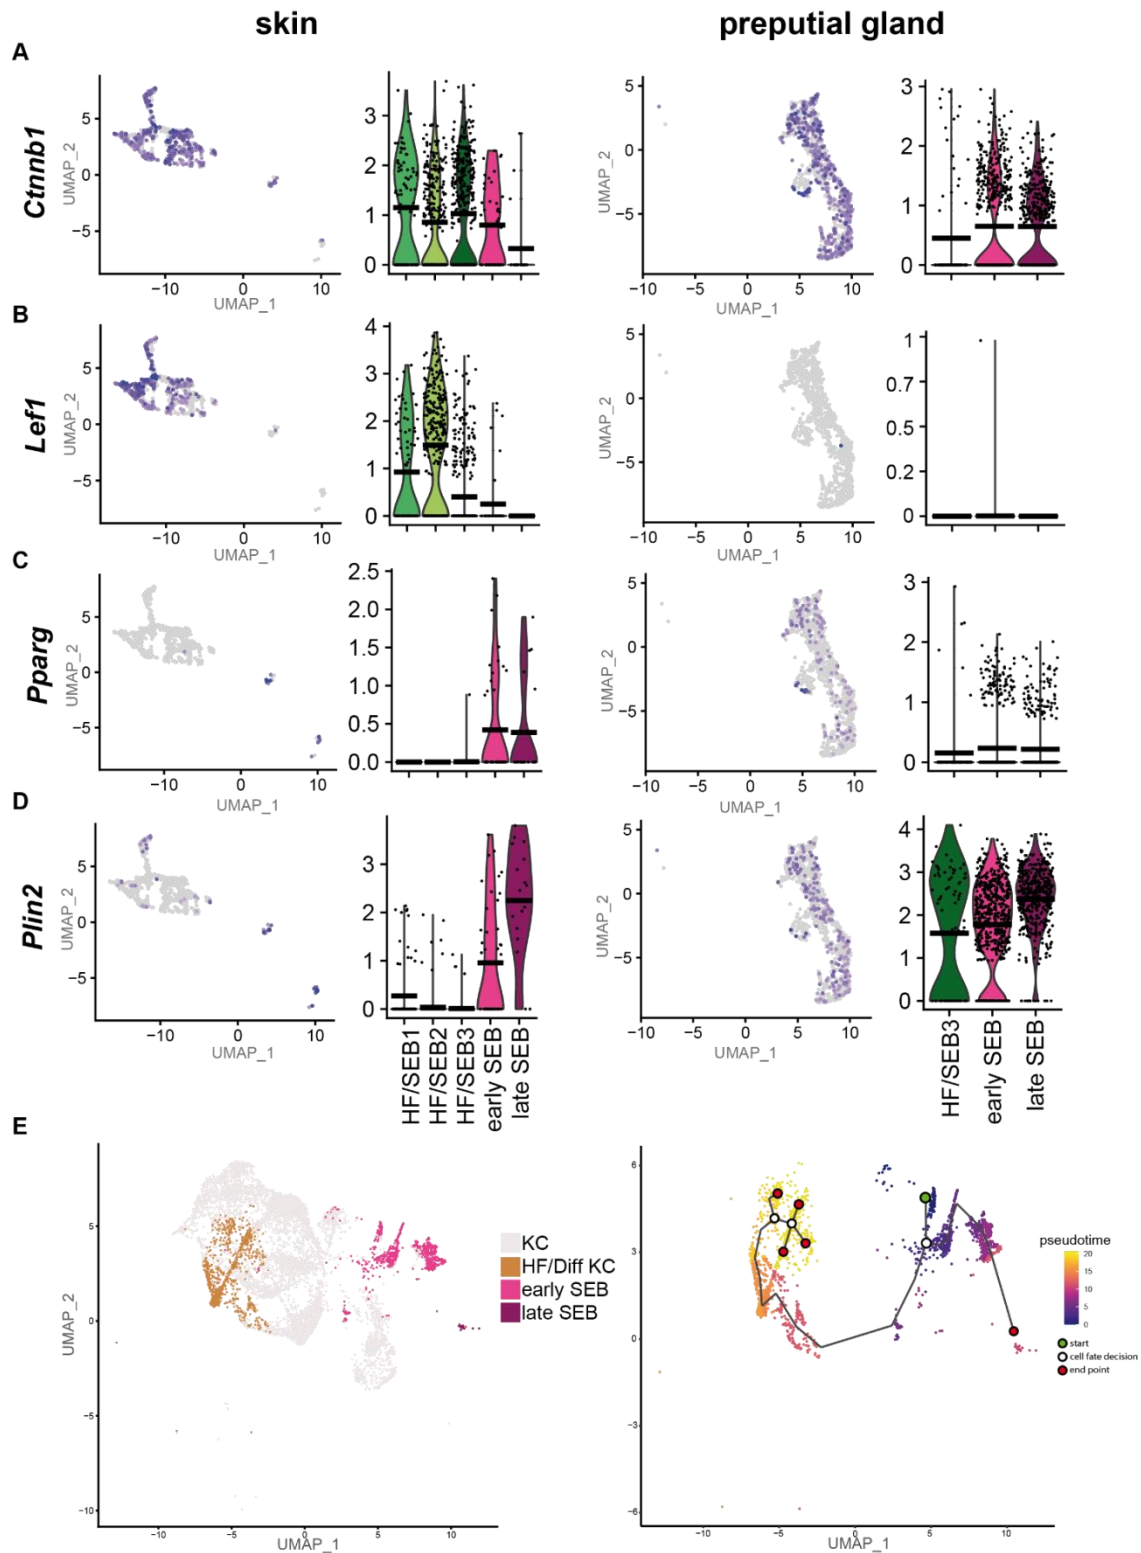

213

214 **Figure 3.** Preputial gland sebocytes lack downstream effector genes relevant for HF/SG lineage decision. Featureplots and violin plots  
 215 of the integrated sebocyte subcluster from skin and preputial gland showing the expression of (A)  $\beta$ -catenin (*Ctnnb1*), (B) Lymphoid  
 216 enhancer binding factor-1 (*Lef1*), (C) Peroxisome proliferator-activated receptor gamma (*Pparg*), (D) Perilipin 2 (*Plin2*). Violin-plots  
 217 show gene expression levels and crossbar of violin-plots depicts mean expression value. Vertical lines show maximum expression.  
 218 Width of violins represents the frequency of cells at the corresponding expression levels. (E) UMAP-plot and pseudotime trajectory  
 219 track starting from *Blimp*<sup>+</sup> sebocyte precursors (green circle). Colour code indicates computational calculated progression in  
 220 differentiation. White circles indicate cell fate decision check points and red circles depict differentiation end points.

#### 2.4 Key enzymes of critical lipid synthesis pathways are differentially expressed in sSEB and pSEB

To investigate differences in the lipid synthesis pathways between sSEB and pSEB, we analyzed the expression of enzymes important for the production of squalene and sphingolipids.

Analysis of the expression levels of key enzymes involved in the synthesis of squalene (Figure 4A) revealed that most of these enzymes (*Hmgcs1*, *Hmgcr* and *Fdps*) were significantly increased in late SEB in both tissues (Figure 4B-D). Interestingly, expression levels of the squalene synthase (*Fdft1*) differed significantly between skin and PGs (Figure 4E). Whereas *Fdft1* was highly expressed in sSEB, its expression was almost completely absent in pSEB, suggesting strongly reduced cholesterol synthesis. Together, these data indicate that pSEB-derived lipids produced via the mevalonate/isoprenoid pathway are more likely to follow the non-sterol branch.

Our scRNAseq data revealed significant differences in expression levels of genes involved in the synthesis of bioactive sphingolipids (Figure 5A). Figure 5B shows the average gene expression levels of key enzymes involved in *de novo*, sphingomyelinase and salvage lipid synthesis. *Sptlc1*, the key enzyme for *de novo* synthesis, was significantly higher expressed in pSEB compared to sSEB (Figure 5B, C). In contrast, sSEB showed higher expression levels of *Smpd1*, critically involved in ceramide synthesis from sphingomyelin (Figure 5B, C). Enzymes which further process ceramide into either sphingomyelin or other sphingolipids within the Golgi, such as *Sgms1* and *Ugcg*, were expressed at higher levels in sSEB, or were completely absent from pSEB (Figure 5B). Not only the initiating enzyme of sphingomyelin-ceramide conversion, *Smpd1*, but also downstream effector enzymes within the endo-lysosomal compartment, such as the acid ceramidase *Asah1*, exhibited higher expression levels in sSEB (Figure 5C). Furthermore, *Cers4* expression was found to be almost exclusively linked to sSEB, while pSEB showed higher specificity for *Sphk1* (Figure 5D).

Together, these differences in enzyme expression levels suggest that pSEB sphingolipid synthesis occurs rather *de novo* with subsequent processing of ceramide to sphingosine in order to generate sphingosine-1-P. Contrary, sSEB appear to synthesize a broader range of bioactive sphingolipids and recycle free sphingosine to ceramide via the salvage pathway.

### 3. Discussion

Lipids are bioactive signaling molecules, triggering a vast array of cellular responses [30]. In the skin, SG are the main producers of lipids, specifically sphingolipids and the cholesterol precursor squalene, both of which critically contribute to the establishment and maintenance of the skin barrier [18], [64]–[68]. Since PG have often been used as a model for skin SG, we analyzed both tissues on single cell level and found striking differences in the differentiation program and lipid synthesis processes in sebocytes of both organs.

sSEB differentiation from sebocyte stem cells is described to follow a tightly controlled program which allows the cells to either differentiate into HF cells or SG cells [10]. By contrast, pSEB differentiation is only poorly described, and our data suggest that it follows a different developmental program. Our single cell analysis identified the ability of sSEB to differentiate into HF cells as the major difference between both organs. Especially genes downstream of  $\beta$ -catenin, were not expressed in pSEB [9], [10]. Interestingly, *Blimp1*<sup>+</sup> SG stem cells were only identified in sSEB but not in pSEB, suggesting that the SEB stem cells already differ significantly between SG and PG. It is yet unclear which cells serve as pSEB precursors and which differentiation pathway is crucial for lipid-specialized cell fate decisions. Thus, pSEB cannot substitute sSEB in *in vitro* studies investigating sSEB differentiation and potential ensuing consequences for HF homeostasis.



A

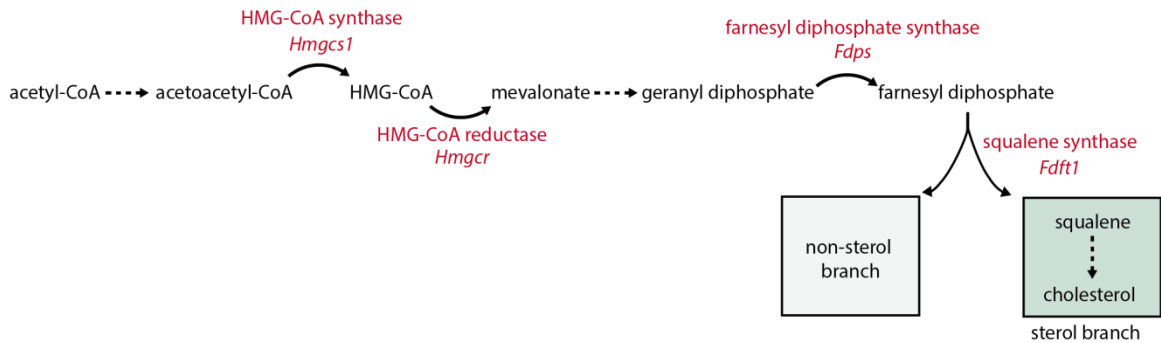

B

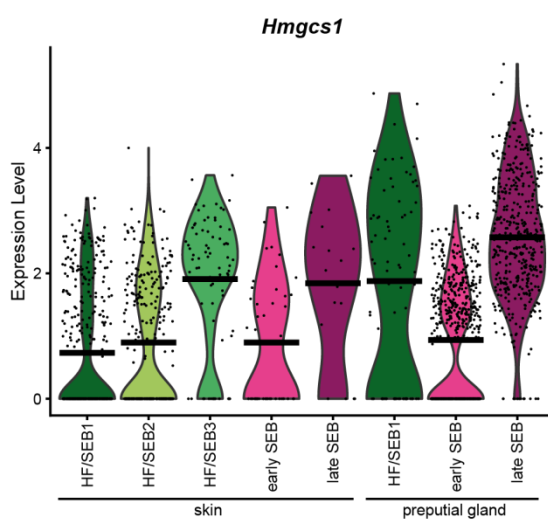

C

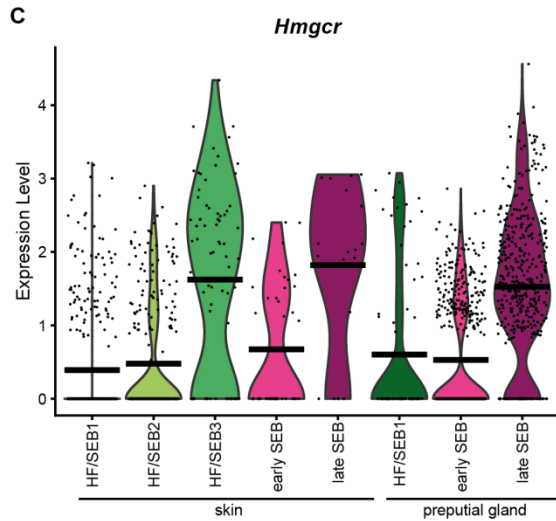

D

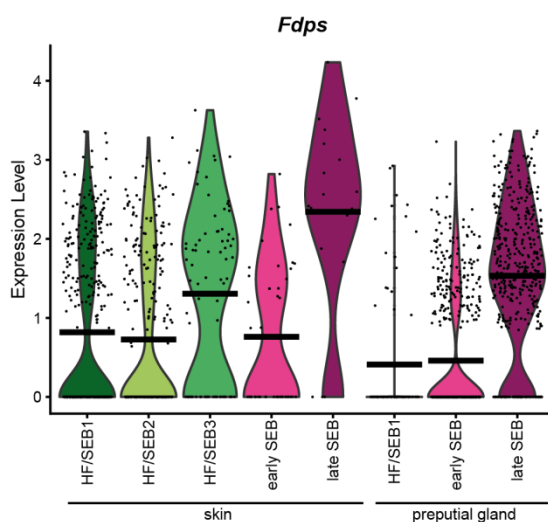

E

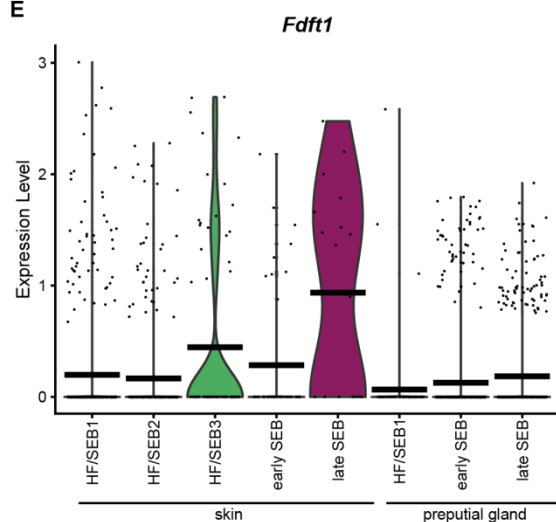

273

274 **Figure 4.** Key enzymes of the mevalonate lipid synthesis pathway are less expressed in preputial gland sebocytes. (A) Schematic  
 275 depiction of the mevalonate pathway and key enzymes involved in the synthesis of squalene. (B)-(E) Violin plots showing the  
 276 expression level of (B) HMG-CoA-synthase (*Hmgcs1*), (C) HMG-CoA reductase (*Hmgcr*), (D) farnesyl diphosphate synthase (*Fdps*),  
 277 and (E) squalene synthase (*Fdft1*). Violin-plots show gene expression levels and crossbar of violin-plots depicts mean expression value.  
 278 Vertical lines show maximum expression. Width of violins represents the frequency of cells at the corresponding expression levels.

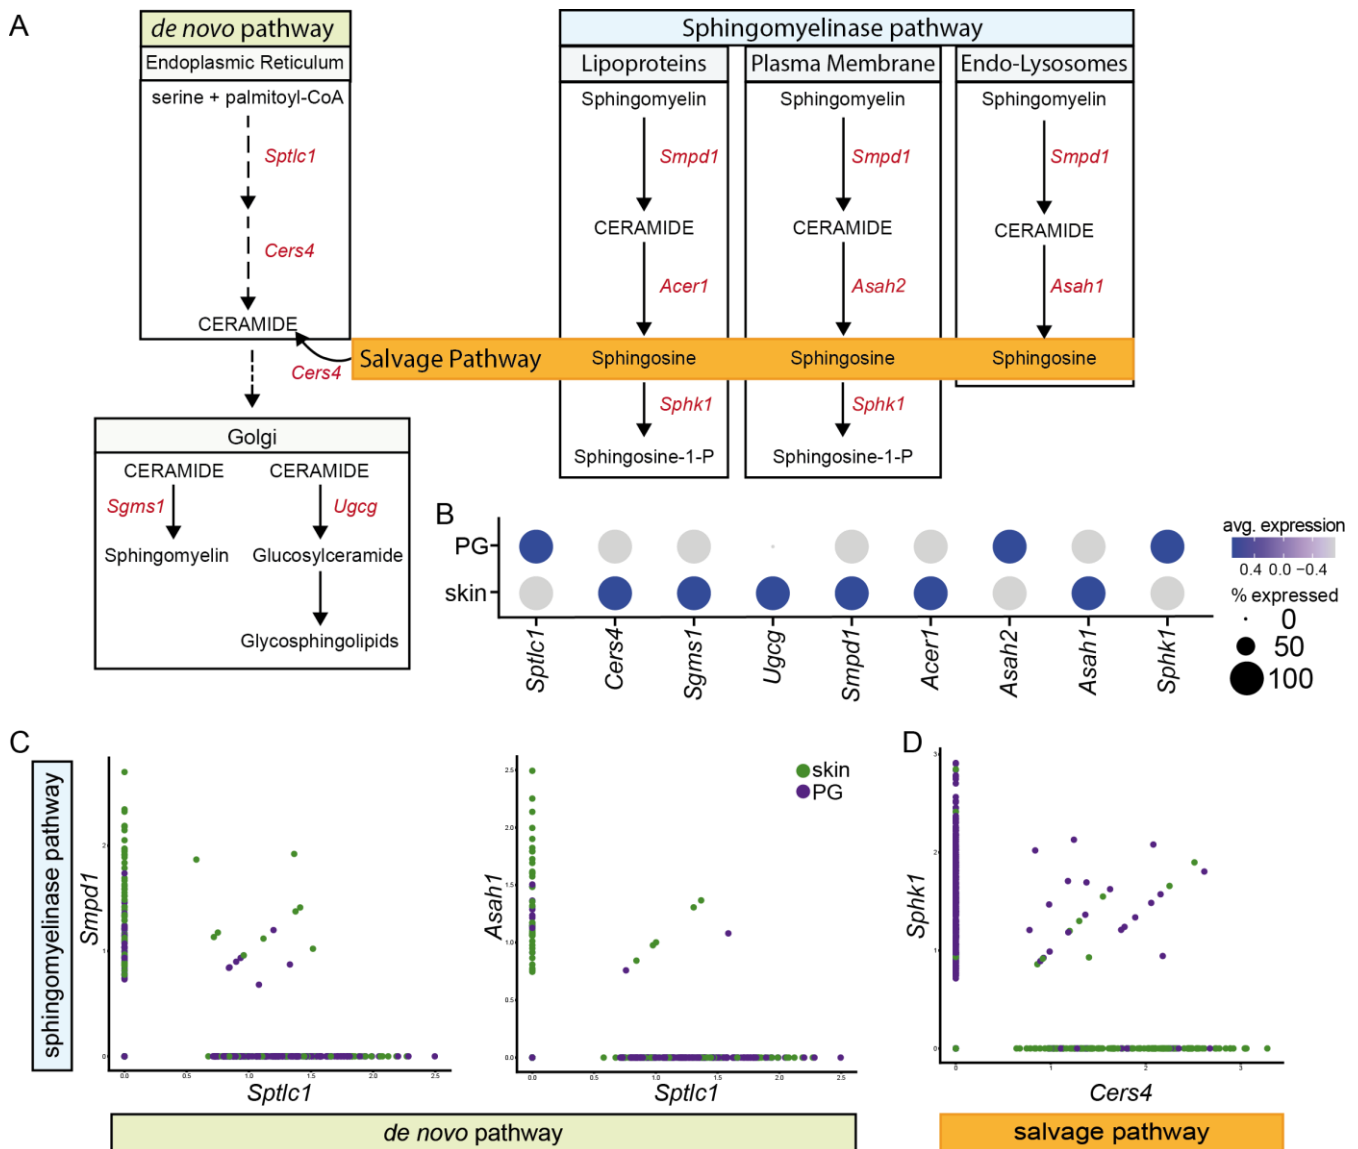

279

280 **Figure 5.** Preputial gland sebocytes are limited to *de novo* biosynthesis of sphingolipids. (A) Schematic drawing of the *de novo*,  
 281 sphingomyelinase and salvage pathway of ceramide- and ceramide metabolite synthesis. Key enzymes involved in the respective  
 282 pathways are coloured in red. *Sptlc1*: serine palmitoyltransferase1; *Cers4*: ceramide synthase 4; *Sgms1*: sphingomyelin synthase 1;  
 283 *Ugcg*: ceramide glucosyltransferase; *Smpd1*: sphingomyelinase 1; *Acer1*: alkaline ceramidase; *Asah2*: neutral ceramidase; *Asah1*: acid  
 284 ceramidase; *Sphk1*: sphingosine kinase 1. (B) Dotplot of average gene expression of the key enzymes involved in the synthesis of  
 285 sphingolipids in preputial gland and skin tissue. Point size indicates relative averaged amount of positive cells. Colour code indicates  
 286 average gene expression levels. (C) Featurescatter-plot of sSEB and pSEB shows correlation gene expression of *Smpd1* and *Sptlc1*, or  
 287 *Asah1* and *Sptlc1*. (D) Featurescatter-plot of sSEB and pSEB showing correlation gene expression of *Sphk1* and *Cers4*. Gene  
 288 expression levels for each gene respectively is shown on either x- or y-axis.

289

290 In addition to these fundamental dissimilarities, sSEB and pSEB further showed sig-  
291 nificant differences in expression levels of key enzymes involved in lipid synthesis. Squa-  
292 lene serves as SG-derived precursor for cholesterol synthesis by keratinocytes [22]. Inter-  
293 estingly, literature on squalene in rodent sebum and preputial glands is rather controver-  
294 sial. While some previous studies showed that the cholesterol precursor squalene is absent  
295 from rodent skin surface lipids and preputial glands, others identified squalene in both  
296 organs [69]–[73]. It is noteworthy that these studies, providing the foundation for modern  
297 research, relied on volatile analysis methods [70], [71]. As cholesterol is found on the skin  
298 surface and within preputial gland lipids and squalene-cholesterol conversion occurs at  
299 rather high frequency with low storage rates of squalene in rodents, the majority of reports  
300 indicate that squalene is indeed produced in both organs [24], [70]–[72], [74], [75]. In ad-  
301 dition, we found high levels of key enzymes of the mevalonate pathway in sSEB and pSEB,  
302 which is upstream of squalene synthase. Interestingly, we detected remarkable differences  
303 in the expression of squalene synthase between sSEB and pSEB. The low levels of squalene  
304 synthase found in pSEB suggest that these cells rather produce non sterol compounds,  
305 while the synthesis of squalene in sSEB offers a decision between the non-sterol and the  
306 sterol branch, eventually leading to cholesterol synthesis by keratinocytes [76]. Given that  
307 cholesterol can either be synthesized *de novo* via the mevalonate pathway, or taken up  
308 from peripheral tissues via binding of low density lipoprotein (LDL) and high density  
309 lipoprotein (HDL), pSEB may not require squalene as cholesterol precursor and circum-  
310 vent squalene synthase by LDL or HDL receptor mediated endocytosis [27], [76]. This  
311 substitute source of cholesterol may contribute to sufficient levels of cholesterol independ-  
312 ent of *de novo* synthesis for pheromone-associated functions in the PG. Of note, besides  
313 serving as cholesterol precursor, squalene is also known to protect the skin from UV-irra-  
314 diation-induced injury [77]. In addition, UV irradiation triggers a decomposition of skin  
315 surface lipids, specifically squalene, resulting in the generation of lipoperoxides of squa-  
316 lene, which are able to reduce contact hypersensitivity in mice [78]. Since PG are not  
317 reached by UV-radiation, this protective mechanism is irrelevant in PG and may result in  
318 a generally reduced requirement for squalene synthesis.

319 Previous studies implicated CER in intracellular as well as stress-induced signaling  
320 responses influencing keratinocyte proliferation, differentiation and apoptosis [79]. In  
321 terms of maintaining epidermal barrier function, ceramide is believed to act on PPAR  
322 which stimulates keratinocyte differentiation [40]. Furthermore, PPAR activation leads to  
323 ATP binding cassette transporter family-12 production serving as critical regulator of glu-  
324 cosylceramide delivery to lamellar bodies, which in turn contributes to epidermal barrier  
325 formation [80], [81]. Considering the high potency of ceramide as second messenger in  
326 intracellular signaling critically influencing epidermal barrier function, we investigated  
327 key enzymes involved in *de novo* as well as salvaged sphingolipid synthesis [18], [80]–[84].  
328 Our scRNA sequencing data revealed that rate limiting enzymes in sphingolipid synthe-  
329 sis, such as serine palmitoyltransferase (*Sptlc1*) and sphingomyelinase (SMase; *Smpd1*),  
330 are present in SEB of both tissues. However, our data suggest that sphingolipid synthesis  
331 in PGs favors *de novo* synthesis, as *Sptlc1* expression levels were significantly higher in  
332 pSEB. The most prominent difference was identified in the salvage pathway, as pSEB  
333 showed little to no ceramide synthase (*CerS*) expression but high expression of sphingo-  
334 sine kinase 1 (*Sphk1*). Together, these findings indicate that whereas sSEB preferentially  
335 produce CER, pSEB favor the production of sphingosine-1-phosphate (S1P) from sphin-  
336 gosine. Besides the crucial contribution of ceramide to the establishment of a functional  
337 skin barrier it has been previously linked to suppress steroid hormone production which  
338 is a major function of the PG [85]–[91]. In contrast, *Sphk1* and its lipid product S1P have  
339 been linked to promote steroid hormone production [87], [92]–[96]. Taken together, our  
340 data suggest a higher affinity of sSEB to produce ceramide, independently of either the *de*  
341 *novovo* or salvage route, while pSEB appear to be more specialized in lipid production rele-  
342 vant for steroid hormone production, where increasing ceramide levels are unfavorable.  
343 Additionally, ceramide metabolites such as glucosylceramide and glycosphingolipids are

of vital importance for epidermal barrier function by either serving as precursors for stratum corneum derived ceramide or actively contributing to skin barrier homeostasis [97], [98]. The discrepancy in enzymatic expression levels important for the conversion of ceramide to glucosylceramides and glycosphingolipids further indicates fundamental differences between sSEB and pSEB.

In summary, besides superficial transcriptional similarities and morphological resemblances, pSEB show tremendous differences rendering them highly unfavorable as substitute model for sSEB. Our study has built the basement for further studies, which will be necessary to fully understand the fundamental differences in the various SEB populations and to elucidate which results obtained from pSEB can indeed be extrapolated to sSEB.

## 4. Materials and Methods

### 4.1 Animals

Three male wild type C57BL/6 mice at the age of 52 weeks were used for this study. Biopsies were obtained from back skin and preputial glands. Skin biopsies as well as preputial gland samples were pooled respectively and subsequently processed for single cell RNA sequencing, protein lysates or histology.

### 4.2 Single cell RNA Sequencing (scRNAseq)

Immediately after obtaining the skin biopsies and preputial glands, tissues were enzymatically digested using GentleMACS whole skin dissociation kit (Miltenyi Biotec, Bergisch-Gladbach, Germany) according to the manufacturers protocol. Samples were further processed on a GentleMACS OctoDissociator (Miltenyi). The cell suspension was filtered through 100 $\mu$ m and 40 $\mu$ m filters and washed with 0.04% bovine serum albumin (BSA, Sigma Aldrich, St. Louis, Mo, USA) in PBS. Cell viability and concentration was assessed using Acridine Orange/Propidium Iodide (AO/PI) Cell Viability Kit (Logos Biosystems, Anyang-si, Gyeonggi-do, South Korea) and analyzed on a LUNA-FLDual Fluorescence Cell Counter (Logos Biosystems). Cell concentrations were adjusted to 0.7 to 1.2  $\times 10^6$  cells/ml. Subsequently, gel beads-in-emulsion (GEMs) were generated. GEM generation, barcoding, sample clean-up, cDNA amplification as well as library construction were performed in accordance to the manufacturers protocol using Chromium Next GEM Single Cell 3'GEM, Library and Gel Bead Kit v3.1, Chromium Next GEM Chip G Single Cell Kit, and Single Index Kit T Set A (10x Genomics, Pleasanton, CA, USA). Final RNA-sequencing, demultiplexing and counting was performed by the Biomedical Sequencing Facility (BSF) of the Center for Molecular Medicine (CeMM, Vienna, Austria). Obtaining samples and acquiring cell suspensions by Chromium instrument occurred within 4 hours. In total, data of approximately 10,000 cells were obtained.

### 4.3 Data analysis (Bioinformatics)

Bioinformatics analyses were carried out using R (R version 4.0.3, The R Foundation, Vienna, Austria), R-studio desktop application and the R-Package "Seurat" (Seurat v4.0.3, Satija Lab).[99]–[102] To reduce variations cells with very low or very high unique molecular identifiers (UMI) or high percentage of mitochondrial gene counts were excluded for subsequent analyses. PCA and UMAP were calculated and all further subset analyses were based on raw data of the cells of interest. Different cell populations were identified based on clustermarker features and checked for well-established marker genes for sophisticated cluster definition (supplementary Figure 1). Gene ontology (GO) enrichment analyses were carried out based on clustermarker and differentially expressed gene calculations. Only genes with a fold change greater than 1.5 or smaller than 0.6 were included. The publicly available enrichment tool Metascape was used for GO enrichment

394 analyses.[103] A p-value cutoff of 0.01 and a minimum enrichment score of 3 was set for  
395 GO terms with molecular function and biological process membership.

#### 398 4.4 Immunofluorescence and H&E

399 For immunofluorescent staining tissue samples were formalin-fixed, embedded in  
400 paraffin and cut into 5µm thick sections. Paraffin sections were deparaffinised by heating  
401 and ethanol dilution series (100%, 80%, 30%). Antigen de-masking was performed with  
402 Dako TRS citrate buffer at pH6 (Agilent Technologies, Santa Clara, CA, USA). Sample  
403 sections were incubated with anti *Scd1* (ab236868, Abcam) primary antibody diluted in  
404 2%BSA in PBS overnight at 4°C. Secondary antibody was diluted in 2%BSA in PBS. Hae-  
405 matoxilin and eosin staining was performed according to routine laboratory procedures.  
406 Images were acquired with an Olympus BX63 microscope (Olympus, Tokyo, Japan) with  
407 MetaMorph imaging software.  
408

409 **Supplementary Materials:** The following are available online at [www.mdpi.com/xxx/s1](http://www.mdpi.com/xxx/s1), Figure S1:  
410 Cell Population definition based on clustermarker, Figure S2: HF-associated gene expression in SEB,  
411 Figure S3: HF/Diff KC cluster marker and Blimp1 expression.

412 **Author Contributions:** Conceptualization, MM., KK.; methodology, MM, KK, MD, DC; software,  
413 KK, DC, MD.; validation, KK, PP.; formal analysis, KK.; investigation, KK, PP.; resources, HJA, MM.;  
414 data curation, KK.; writing—original draft preparation, KK, MM.; writing—review and editing, KK,  
415 ML, MM.; visualization, KK.; supervision, MM.; project administration, MM, KK.; funding acquisi-  
416 tion, MM, HJA. All authors have read and agreed to the published version of the manuscript.

417 **Funding:** This research project was financed in part by the FFG Grant “APOSEC” (852748 and  
418 862068/918 2015-2019), by the Vienna Business Agency “APOSEC to clinic,” (ID 2343727, 2018-2020),  
419 and by the Aposcience AG under group leader HJA. MM was funded by the Sparkling Science Pro-  
420 gram of the Austrian Federal Ministry of Education, Science and Research (SPA06/055).

421 **Data Availability Statement:** ScRNASeq data are available in NCBI’s Gene Expression Omnibus  
422 (GEO); accession number GSE185268.

423 **Acknowledgments:** We thank the HP Haselsteiner and the CRISCAR Familienstiftung for their be-  
424 lief in this private public partnership to augment basic and translational clinical research.

425 **Conflicts of Interest:** The authors declare no conflict of interest.  
426

## 427 References

- 428 [1] J. P. Sundberg, C. J. Booth, L. B. Nanney, P. Fleckman, and L. E. King, “24 - Skin and Adnexa,” in *Comparative*  
429 *Anatomy and Histology (Second Edition)*, Second Edi., P. M. Treuting, S. M. Dintzis, and K. S. Montine, Eds. San  
430 Diego: Academic Press, 2018, pp. 511–542.
- 431 [2] D. Deplewski and R. L. Rosenfield, “Role of Hormones in Pilosebaceous Unit Development,” *Endocr. Rev.*, vol.  
432 21, no. 4, pp. 363–392, Aug. 2000, doi: 10.1210/EDRV.21.4.0404.
- 433 [3] C. C. Zouboulis, “Acne and sebaceous gland function,” *Clin. Dermatol.*, vol. 22, no. 5, pp. 360–366, 2004, doi:  
434 10.1016/j.clindermatol.2004.03.004.
- 435 [4] C. C. Zouboulis *et al.*, “Frontiers in sebaceous gland biology and pathology,” *Exp. Dermatol.*, vol. 17, no. 6, pp.  
436 542–551, Jun. 2008, doi: 10.1111/j.1600-0625.2008.00725.x.
- 437 [5] M. Lovászi, A. Szegedi, C. C. Zouboulis, and D. Törócsik, “Sebaceous-immunobiology is orchestrated by sebum  
438 lipids,” *Dermatoendocrinol.*, vol. 9, no. 1, p. e1375636, Jan. 2017, doi: 10.1080/19381980.2017.1375636.
- 439 [6] R. W. Clayton, K. Göbel, C. M. Niessen, R. Paus, M. A. M. van Steensel, and X. Lim, “Homeostasis of the  
440 sebaceous gland and mechanisms of acne pathogenesis,” *British Journal of Dermatology*, vol. 181, no. 4. Blackwell

Publishing Ltd, pp. 677–690, Oct. 06, 2019, doi: 10.1111/bjd.17981.

[7] H. Fischer *et al.*, “Holocrine Secretion of Sebum Is a Unique DNase2-Dependent Mode of Programmed Cell Death,” *J. Invest. Dermatol.*, vol. 137, no. 3, pp. 587–594, Mar. 2017, doi: 10.1016/j.jid.2016.10.017.

[8] B. J. Merrill, U. Gat, R. DasGupta, and E. Fuchs, “Tcf3 and Lef1 regulate lineage differentiation of multipotent stem cells in skin,” *Genes Dev.*, vol. 15, no. 13, pp. 1688–1705, Jul. 2001, doi: 10.1101/gad.891401.

[9] Y. Zhang *et al.*, “Lef1 contributes to the differentiation of bulge stem cells by nuclear translocation and cross-talk with the notch signaling pathway,” *Int. J. Med. Sci.*, vol. 10, no. 6, pp. 738–746, Apr. 2013, doi: 10.7150/ijms.5693.

[10] C. Niemann, “Differentiation of the sebaceous gland,” *Dermatoendocrinol.*, vol. 1, no. 2, pp. 64–67, Mar. 2009, doi: 10.4161/derm.1.2.8486.

[11] E. D. Rosen *et al.*, “PPAR $\gamma$  is required for the differentiation of adipose tissue in vivo and in vitro,” *Mol. Cell*, vol. 4, no. 4, pp. 611–617, 1999, doi: 10.1016/S1097-2765(00)80211-7.

[12] V. Y. Shi, M. Leo, L. Hassoun, D. S. Chahal, H. I. Maibach, and R. K. Sivamani, “Role of sebaceous glands in inflammatory dermatoses,” *Journal of the American Academy of Dermatology*, vol. 73, no. 5. Mosby, pp. 856–863, Nov. 01, 2015, doi: 10.1016/j.jaad.2015.08.015.

[13] B. C. Melnik, “Acne vulgaris: The metabolic syndrome of the pilosebaceous follicle,” *Clin. Dermatol.*, vol. 36, no. 1, pp. 29–40, Jan. 2018, doi: 10.1016/j.clindermatol.2017.09.006.

[14] C. W. Choi, J. W. Choi, K. C. Park, and S. W. Youn, “Facial sebum affects the development of acne, especially the distribution of inflammatory acne,” *J. Eur. Acad. Dermatology Venereol.*, vol. 27, no. 3, pp. 301–306, Mar. 2013, doi: 10.1111/J.1468-3083.2011.04384.X.

[15] A. Rao, S. C. Douglas, and J. M. Hall, “Endocrine Disrupting Chemicals, Hormone Receptors, and Acne Vulgaris: A Connecting Hypothesis,” *Cells*, vol. 10, no. 6. Multidisciplinary Digital Publishing Institute (MDPI), Jun. 09, 2021, doi: 10.3390/cells10061439.

[16] K. Agrawal *et al.*, “Effects of Atopic Dermatitis and Gender on Sebum Lipid Mediator and Fatty Acid Profiles,” *Prostaglandins. Leukot. Essent. Fatty Acids*, vol. 134, p. 7, Jul. 2018, doi: 10.1016/J.PLEFA.2018.05.001.

[17] S. Knox and N. M. O’Boyle, “Skin lipids in health and disease: A review,” *Chemistry and Physics of Lipids*, vol. 236. Chem Phys Lipids, May 01, 2021, doi: 10.1016/j.chemphyslip.2021.105055.

[18] S. Borodzicz, L. Rudnicka, D. Mirowska-Guzel, and A. Cudnoch-Jedrzejewska, “The role of epidermal sphingolipids in dermatologic diseases,” *Lipids in Health and Disease*, vol. 15, no. 1. BioMed Central, Jan. 19, 2016, doi: 10.1186/s12944-016-0178-7.

[19] S. H. Moon, J. Y. Kim, E. H. Song, M. K. Shin, Y. H. Cho, and N. I. Kim, “Altered levels of sphingosine and sphinganine in psoriatic epidermis,” *Ann. Dermatol.*, vol. 25, no. 3, pp. 321–326, Aug. 2013, doi: 10.5021/ad.2013.25.3.321.

[20] T. Buhl *et al.*, “Molecular and Morphological Characterization of Inflammatory Infiltrate in Rosacea Reveals Activation of Th1/Th17 Pathways,” *J. Invest. Dermatol.*, vol. 135, no. 9, pp. 2198–2208, Sep. 2015, doi: 10.1038/JID.2015.141.

[21] R. L. Gallo *et al.*, “Rosacea comorbidities and future research: The 2017 update by the National Rosacea Society Expert Committee,” *J. Am. Acad. Dermatol.*, vol. 78, no. 1, pp. 167–170, Jan. 2018, doi: 10.1016/J.JAAD.2017.06.150.

[22] C. De Luca and G. Valacchi, “Surface lipids as multifunctional mediators of skin responses to environmental stimuli,” *Mediators of Inflammation*, vol. 2010. Hindawi Limited, 2010, doi: 10.1155/2010/321494.

[23] M. Picardo, M. Ottaviani, E. Camera, A. Mastrofrancesco, and M. E. Stewart, *Sebaceous gland lipids*, vol. 11, no. 2. Taylor & Francis, 1992, pp. 100–105.

[24] K. R. Smith and D. M. Thiboutot, “Thematic review series: Skin Lipids. Sebaceous gland lipids: Friend or foe?,”

483 *Journal of Lipid Research*, vol. 49, no. 2. pp. 271–281, Feb. 2008, doi: 10.1194/jlr.R700015-JLR200.

484 [25] T. R. Tansey and I. Shechter, "Structure and regulation of mammalian squalene synthase," *Biochimica et*  
485 *Biophysica Acta - Molecular and Cell Biology of Lipids*, vol. 1529, no. 1–3. Elsevier, pp. 49–62, Dec. 15, 2000, doi:  
486 10.1016/S1388-1981(00)00137-2.

487 [26] P. A. Edwards and J. Ericsson, "Sterols and isoprenoids: Signaling molecules derived from the cholesterol  
488 biosynthetic pathway," *Annual Review of Biochemistry*, vol. 68. Annu Rev Biochem, pp. 157–185, 1999, doi:  
489 10.1146/annurev.biochem.68.1.157.

490 [27] J. L. Goldstein and M. S. Brown, "Regulation of the mevalonate pathway," *Nature*, vol. 343, no. 6257. Nature, pp.  
491 425–430, 1990, doi: 10.1038/343425a0.

492 [28] R. Sato and T. Takano, "Regulation of Intracellular Cholesterol Metabolism," *Cell Struct. Funct.*, vol. 20, no. 6, pp.  
493 421–427, 1995, doi: 10.1247/csf.20.421.

494 [29] K. Brusselmans *et al.*, "Squalene synthase, a determinant of raft-associated cholesterol and modulator of cancer  
495 cell proliferation," *J. Biol. Chem.*, vol. 282, no. 26, pp. 18777–18785, Jun. 2007, doi: 10.1074/jbc.M611763200.

496 [30] Y. A. Hannun and L. M. Obeid, "Principles of bioactive lipid signalling: Lessons from sphingolipids," *Nature*  
497 *Reviews Molecular Cell Biology*, vol. 9, no. 2. Nat Rev Mol Cell Biol, pp. 139–150, Feb. 2008, doi: 10.1038/nrm2329.

498 [31] A. Carpinteiro, C. Dumitru, M. Schenck, and E. Gulbins, "Ceramide-induced cell death in malignant cells,"  
499 *Cancer Letters*, vol. 264, no. 1. Cancer Lett, pp. 1–10, Jun. 08, 2008, doi: 10.1016/j.canlet.2008.02.020.

500 [32] E. Gulbins and L. L. Pin, "Physiological and pathophysiological aspects of ceramide," *American Journal of*  
501 *Physiology - Regulatory Integrative and Comparative Physiology*, vol. 290, no. 1. Am J Physiol Regul Integr Comp  
502 Physiol, Jan. 2006, doi: 10.1152/ajpregu.00416.2005.

503 [33] B. Pettus, C. Chalfant, and Y. Hannun, "Sphingolipids in Inflammation: Roles and Implications," *Curr. Mol. Med.*,  
504 vol. 4, no. 4, pp. 405–418, Mar. 2005, doi: 10.2174/1566524043360573.

505 [34] B. Ogretmen and Y. A. Hannun, "Biologically active sphingolipids in cancer pathogenesis and treatment," *Nature*  
506 *Reviews Cancer*, vol. 4, no. 8. Nat Rev Cancer, pp. 604–616, 2004, doi: 10.1038/nrc1411.

507 [35] P. P. Ruvolo, "Ceramide regulates cellular homeostasis via diverse stress signaling pathways," *Leukemia*, vol. 15,  
508 no. 8. Leukemia, pp. 1153–1160, 2001, doi: 10.1038/sj.leu.2402197.

509 [36] D. K. Perry, "Serine palmitoyltransferase: Role in apoptotic de novo ceramide synthesis and other stress  
510 responses," *Biochimica et Biophysica Acta - Molecular and Cell Biology of Lipids*, vol. 1585, no. 2–3. Elsevier, pp. 146–  
511 152, Dec. 30, 2002, doi: 10.1016/S1388-1981(02)00335-9.

512 [37] R. W. Jenkins, D. Canals, and Y. A. Hannun, "Roles and regulation of secretory and lysosomal acid  
513 sphingomyelinase," *Cellular Signalling*, vol. 21, no. 6. NIH Public Access, pp. 836–846, Jun. 2009, doi:  
514 10.1016/j.cellsig.2009.01.026.

515 [38] T. D. Mullen, Y. A. Hannun, and L. M. Obeid, "Ceramide synthases at the centre of sphingolipid metabolism  
516 and biology," *Biochemical Journal*, vol. 441, no. 3. Biochem J, pp. 789–802, Feb. 01, 2012, doi: 10.1042/BJ20111626.

517 [39] M. Lai, V. La Rocca, R. Amato, G. Freer, and M. Pistello, "Sphingolipid/ceramide pathways and autophagy in  
518 the onset and progression of melanoma: Novel therapeutic targets and opportunities," *Int. J. Mol. Sci.*, vol. 20,  
519 no. 14, Jul. 2019, doi: 10.3390/ijms20143436.

520 [40] Y. Uchida, "Ceramide signaling in mammalian epidermis," *Biochimica et Biophysica Acta - Molecular and Cell*  
521 *Biology of Lipids*, vol. 1841, no. 3. NIH Public Access, pp. 453–462, Mar. 2014, doi: 10.1016/j.bbailip.2013.09.003.

522 [41] T. A. Taha, T. D. Mullen, and L. M. Obeid, "A house divided: Ceramide, sphingosine, and sphingosine-1-  
523 phosphate in programmed cell death," *Biochimica et Biophysica Acta - Biomembranes*, vol. 1758, no. 12. NIH Public  
524 Access, pp. 2027–2036, Dec. 2006, doi: 10.1016/j.bbamem.2006.10.018.

- 525 [42] K. Kitatani, J. Idkowiak-Baldys, and Y. A. Hannun, "The sphingolipid salvage pathway in ceramide metabolism  
526 and signaling," *Cellular Signalling*, vol. 20, no. 6. NIH Public Access, pp. 1010–1018, Jun. 2008, doi:  
527 10.1016/j.cellsig.2007.12.006.
- 528 [43] G. Tettamanti, "Ganglioside/glycosphingolipid turnover: New concepts," *Glycoconjugate Journal*, vol. 20, no. 5.  
529 Glycoconj J, pp. 301–317, 2003, doi: 10.1023/B:GLYC.0000033627.02765.cc.
- 530 [44] K. P. Becker, K. Kitatani, J. Idkowiak-Baldys, J. Bielawski, and Y. A. Hannun, "Selective inhibition of juxtannuclear  
531 translocation of protein kinase C  $\beta$ II by a negative feedback mechanism involving ceramide formed from the  
532 salvage pathway," *J. Biol. Chem.*, vol. 280, no. 4, pp. 2606–2612, Jan. 2005, doi: 10.1074/jbc.M409066200.
- 533 [45] C. C. Zouboulis, H. Seltmann, H. Neitzel, and C. E. Orfanos, "Establishment and characterization of an  
534 immortalized human sebaceous gland cell line (SZ95)," *J. Invest. Dermatol.*, vol. 113, no. 6, pp. 1011–1020, 1999,  
535 doi: 10.1046/j.1523-1747.1999.00771.x.
- 536 [46] C. Lo Celso *et al.*, "Characterization of Bipotential Epidermal Progenitors Derived from Human Sebaceous Gland:  
537 Contrasting Roles of c-Myc and  $\beta$ -Catenin," *Stem Cells*, vol. 26, no. 5, pp. 1241–1252, May 2008, doi:  
538 10.1634/stemcells.2007-0651.
- 539 [47] D. Thiboutot *et al.*, "Human skin is a steroidogenic tissue: Steroidogenic enzymes and cofactors are expressed in  
540 epidermis, normal sebocytes, and an immortalized sebocyte cell line (SEB-1)," *J. Invest. Dermatol.*, vol. 120, no. 6,  
541 pp. 905–914, Jun. 2003, doi: 10.1046/j.1523-1747.2003.12244.x.
- 542 [48] Freinkel RK., "The effect of age and sex on the metabolism of the preputial gland of the rat.," *Adv. Biol. Skin*, vol.  
543 4, 1963.
- 544 [49] M. J. Kim, D. Deplewski, N. Ciletti, S. Michel, U. Reichert, and R. L. Rosenfield, "Limited cooperation between  
545 peroxisome proliferator-activated receptors and retinoid X receptor agonists in sebocyte growth and  
546 development," *Mol. Genet. Metab.*, vol. 74, no. 3, pp. 362–369, 2001, doi: 10.1006/mgme.2001.3242.
- 547 [50] D. Deplewski, S. Liao, and R. L. Rosenfield, "Preputial sebocyte 5 $\alpha$ -reductase isoform specificity," *Endocrinology*,  
548 vol. 138, no. 10, pp. 4416–4420, 1997, doi: 10.1210/endo.138.10.5452.
- 549 [51] K. Miyake, N. Ciletti, S. Liao, and R. L. Rosenfield, "Androgen receptor expression in the preputial gland and its  
550 sebocytes," *J. Invest. Dermatol.*, vol. 103, no. 5, pp. 721–725, 1994, doi: 10.1111/1523-1747.ep12398601.
- 551 [52] R. L. Rosenfield, D. Deplewski, A. Kentsis, and N. Ciletti, "Mechanisms of androgen induction of sebocyte  
552 differentiation," in *Dermatology*, 1998, vol. 196, no. 1, pp. 43–46, doi: 10.1159/000017864.
- 553 [53] D. Thiboutot, A. Sivarajah, K. Gilliland, Z. Cong, and G. Clawson, "The melanocortin 5 receptor is expressed in  
554 human sebaceous glands and rat preputial cells," *J. Invest. Dermatol.*, vol. 115, no. 4, pp. 614–619, 2000, doi:  
555 10.1046/j.1523-1747.2000.00094.X.
- 556 [54] M. Tumiaty *et al.*, "Loss of Rad51c accelerates tumorigenesis in sebaceous glands of Trp53-mutant mice," *J.*  
557 *Pathol.*, vol. 235, no. 1, pp. 136–146, Jan. 2015, doi: 10.1002/path.4455.
- 558 [55] N. Bianchi, D. DePianto, K. McGowan, C. Gu, and P. A. Coulombe, "Exploiting the Keratin 17 Gene Promoter  
559 To Visualize Live Cells in Epithelial Appendages of Mice," *Mol. Cell. Biol.*, vol. 25, no. 16, pp. 7249–7259, Aug.  
560 2005, doi: 10.1128/mcb.25.16.7249-7259.2005.
- 561 [56] L. Yang, S. Zhang, and G. Wang, "Keratin 17 in disease pathogenesis: from cancer to dermatoses," *Journal of*  
562 *Pathology*, vol. 247, no. 2. John Wiley & Sons, Ltd, pp. 158–165, Feb. 01, 2019, doi: 10.1002/path.5178.
- 563 [57] I. Kurokawa, K. Takahashi, I. Moll, and R. Moll, "Expression of keratins in cutaneous epithelial tumors and  
564 related disorders - distribution and clinical significance," *Experimental Dermatology*, vol. 20, no. 3. John Wiley &  
565 Sons, Ltd, pp. 217–228, Mar. 01, 2011, doi: 10.1111/j.1600-0625.2009.01006.x.
- 566 [58] W. Qiu *et al.*, "Hoxc13 is a crucial regulator of murine hair cycle," *Cell Tissue Res.*, vol. 364, no. 1, pp. 149–158,



- 567 Apr. 2016, doi: 10.1007/s00441-015-2312-7.
- 568 [59] M. Fernandez-Guerrero *et al.*, “Mammalian-specific ectodermal enhancers control the expression of Hoxc genes  
569 in developing nails and hair follicles,” *Proc. Natl. Acad. Sci. U. S. A.*, vol. 117, no. 48, pp. 30509–30519, Dec. 2020,  
570 doi: 10.1073/pnas.2011078117.
- 571 [60] H. Jin, Z. Zou, H. Chang, Q. Shen, L. Liu, and D. Xing, “Photobiomodulation therapy for hair regeneration: A  
572 synergetic activation of  $\beta$ -CATENIN in hair follicle stem cells by ROS and paracrine WNTs,” *Stem Cell Reports*,  
573 vol. 16, no. 6, pp. 1568–1583, Jun. 2021, doi: 10.1016/j.stemcr.2021.04.015.
- 574 [61] X. M. Hu *et al.*, “A systematic summary of survival and death signalling during the life of hair follicle stem cells,”  
575 *Stem Cell Research and Therapy*, vol. 12, no. 1. BioMed Central, p. 453, Dec. 01, 2021, doi: 10.1186/s13287-021-02527-  
576 y.
- 577 [62] M. Xu *et al.*, “WNT10A mutation causes ectodermal dysplasia by impairing progenitor cell proliferation and  
578 KLF4-mediated differentiation,” *Nat. Commun.*, vol. 8, Jun. 2017, doi: 10.1038/ncomms15397.
- 579 [63] P. Daszczuk, P. Mazurek, T. D. Pieczonka, A. Olczak, L. M. Boryń, and K. Kobielak, “An Intrinsic Oscillation of  
580 Gene Networks Inside Hair Follicle Stem Cells: An Additional Layer That Can Modulate Hair Stem Cell  
581 Activities,” *Frontiers in Cell and Developmental Biology*, vol. 8. Frontiers, p. 1511, Dec. 10, 2020, doi:  
582 10.3389/fcell.2020.595178.
- 583 [64] P. W. Wertz, “Lipids and the Permeability and Antimicrobial Barriers of the Skin,” *J. Lipids*, vol. 2018, pp. 1–7,  
584 Sep. 2018, doi: 10.1155/2018/5954034.
- 585 [65] D. R. Drake, K. A. Brogden, D. V. Dawson, and P. W. Wertz, “Thematic Review Series: Skin Lipids -  
586 Antimicrobial lipids at the skin surface,” *Journal of Lipid Research*, vol. 49, no. 1. Elsevier, pp. 4–11, Jan. 01, 2008,  
587 doi: 10.1194/jlr.R700016-JLR200.
- 588 [66] C. L. Fischer, “Antimicrobial activity of host-derived lipids,” *Antibiotics*, vol. 9, no. 2. Antibiotics (Basel), Feb. 01,  
589 2020, doi: 10.3390/antibiotics9020075.
- 590 [67] J. Becam *et al.*, “Antibacterial activity of ceramide and ceramide analogs against pathogenic *Neisseria*,” *Sci. Rep.*,  
591 vol. 7, no. 1, Dec. 2017, doi: 10.1038/s41598-017-18071-w.
- 592 [68] M. Danso *et al.*, “Altered expression of epidermal lipid bio-synthesis enzymes in atopic dermatitis skin is  
593 accompanied by changes in stratum corneum lipid composition,” *J. Dermatol. Sci.*, vol. 88, no. 1, pp. 57–66, Oct.  
594 2017, doi: 10.1016/j.jdermsci.2017.05.005.
- 595 [69] T. Nikkari, “Comparative chemistry of sebum,” *J. Invest. Dermatol.*, vol. 62, no. 3, pp. 257–267, 1974, doi:  
596 10.1111/1523-1747.ep12676800.
- 597 [70] N. Nicolaides, H. C. Fu, and G. R. Rice, “The skin surface lipids of man compared with those of eighteen species  
598 of animals,” *J. Invest. Dermatol.*, vol. 51, no. 2, pp. 83–89, Aug. 1968, doi: 10.1038/jid.1968.96.
- 599 [71] N. Nicolaides, H. C. Fu, and M. N. A. Ansari, “Diester waxes in surface lipids of animal skin,” *Lipids*, vol. 5, no.  
600 3, pp. 299–307, Mar. 1970, doi: 10.1007/BF02531461.
- 601 [72] T. L. Burgess and J. D. Wilson, “Studies on Hormonal Regulation of Squalene Synthesis in Preputial Gland and  
602 Skin of the Rat,” *Proc. Soc. Exp. Biol. Med.*, vol. 113, no. 3, pp. 747–750, Nov. 1963, doi: 10.3181/00379727-113-28479.
- 603 [73] J. X. Zhang, L. Sun, J. H. Zhang, and Z. Y. Feng, “Sex- and gonad-affecting scent compounds and 3 male  
604 pheromones in the rat,” *Chem. Senses*, vol. 33, no. 7, pp. 611–621, 2008, doi: 10.1093/chemse/bjn028.
- 605 [74] H. Rossiter *et al.*, “Inactivation of autophagy leads to changes in sebaceous gland morphology and function,”  
606 *Exp. Dermatol.*, vol. 27, no. 10, pp. 1142–1151, Oct. 2018, doi: 10.1111/exd.13752.
- 607 [75] A. J. Thody and S. Shuster, “Control and function of sebaceous glands,” *Physiological Reviews*, vol. 69, no. 2.  
608 *Physiol Rev*, pp. 383–416, 1989, doi: 10.1152/physrev.1989.69.2.383.

- 609 [76] M. A. Palmer, L. Blakeborough, M. Harries, and I. S. Haslam, "Cholesterol homeostasis: Links to hair follicle  
610 biology and hair disorders," *Experimental Dermatology*, vol. 29, no. 3. John Wiley & Sons, Ltd, pp. 299–311, Mar.  
611 01, 2020, doi: 10.1111/exd.13993.
- 612 [77] K. Ohsawa, T. Watanabe, R. Matsukawa, Y. Yoshimura, and K. Imaeda, "The possible role of squalene and its  
613 peroxide of the sebum in the occurrence of sunburn and protection from damage caused by UV irradiation," *J.*  
614 *Toxicol. Sci.*, vol. 9, no. 2, pp. 151–159, 1984, doi: 10.2131/jts.9.151.
- 615 [78] M. Picardo *et al.*, "Squalene peroxides may contribute to ultraviolet light-induced immunological effects,"  
616 *Photodermatol Photoimmunol Photomed.*, 1991.
- 617 [79] E. Jung, R. D. Griner, R. Mann-Blakeney, and W. B. Bollag, "A potential role for ceramide in the regulation of  
618 mouse epidermal keratinocyte proliferation and differentiation," in *Journal of Investigative Dermatology*, vol. 110,  
619 no. 4, *J Invest Dermatol*, 1998, pp. 318–323.
- 620 [80] Y. J. Jiang *et al.*, "Ceramide stimulates ABCA12 expression via peroxisome proliferator-activated receptor  $\delta$  in  
621 human keratinocytes," *J. Biol. Chem.*, vol. 284, no. 28, pp. 18942–18952, Jul. 2009, doi: 10.1074/jbc.M109.006973.
- 622 [81] M. Schmuth *et al.*, "Peroxisome proliferator-activated receptor (PPAR)- $\beta/\delta$  stimulates differentiation and lipid  
623 accumulation in keratinocytes," *J. Invest. Dermatol.*, vol. 122, no. 4, pp. 971–983, Apr. 2004, doi: 10.1111/j.0022-  
624 202X.2004.22412.x.
- 625 [82] K. K. Hong, H. R. Cho, W. C. Ju, Y. Cho, and N. I. Kim, "A study on altered expression of serine  
626 palmitoyltransferase and ceramidase in psoriatic skin lesion," *J. Korean Med. Sci.*, vol. 22, no. 5, pp. 862–867, 2007,  
627 doi: 10.3346/jkms.2007.22.5.862.
- 628 [83] Y. Uchida, A. Di Nardo, V. Collins, P. M. Elias, and W. M. Holleran, "De novo ceramide synthesis participates  
629 in the ultraviolet B irradiation-induced apoptosis in undifferentiated cultured human keratinocytes," *J. Invest.*  
630 *Dermatol.*, vol. 120, no. 4, pp. 662–669, Apr. 2003, doi: 10.1046/j.1523-1747.2003.12098.x.
- 631 [84] K. Nomoto, Y. Itaya, K. Watanabe, T. Yamashita, T. Okazaki, and Y. Tokudome, "Epidermal permeability barrier  
632 function and sphingolipid content in the skin of sphingomyelin synthase 2 deficient mice," *Exp. Dermatol.*, vol.  
633 27, no. 8, pp. 827–832, Aug. 2018, doi: 10.1111/exd.13497.
- 634 [85] L. Coderch, O. López, A. De La Maza, and J. L. Parra, "Ceramides and skin function," *American Journal of Clinical*  
635 *Dermatology*, vol. 4, no. 2. Springer, pp. 107–129, Aug. 21, 2003, doi: 10.2165/00128071-200304020-00004.
- 636 [86] M. J. Choi and H. I. Maibach, "Role of ceramides in barrier function of healthy and diseased skin," *American*  
637 *Journal of Clinical Dermatology*, vol. 6, no. 4. Springer, pp. 215–223, Aug. 21, 2005, doi: 10.2165/00128071-  
638 200506040-00002.
- 639 [87] N. C. Lucki and M. B. Sewer, "Multiple roles for sphingolipids in steroid hormone biosynthesis," *Subcell. Biochem.*,  
640 vol. 49, pp. 387–412, 2008, doi: 10.1007/978-1-4020-8831-5\_15.
- 641 [88] P. Santana *et al.*, "Interleukin- $1\beta$  stimulates sphingomyelin hydrolysis in cultured granulosa cells: Evidence for  
642 a regulatory role of ceramide on progesterone and prostaglandin biosynthesis," *Endocrinology*, vol. 137, no. 6, pp.  
643 2480–2489, 1996, doi: 10.1210/endo.137.6.8641202.
- 644 [89] S. B. Meroni, E. H. Pellizzari, D. F. Cánepa, and S. B. Cigorraga, "Possible involvement of ceramide in the  
645 regulation of rat Leydig cell function," *J. Steroid Biochem. Mol. Biol.*, vol. 75, no. 4–5, pp. 307–313, Dec. 2000, doi:  
646 10.1016/S0960-0760(00)00188-6.
- 647 [90] Q. Li, J. Ni, S. Bian, L. Yao, H. Zhu, and W. Zhang, "Inhibition of steroidogenesis and induction of apoptosis in  
648 rat luteal cells by cell-permeable ceramide in vitro," *Sheng Li Xue Bao*, 2001.
- 649 [91] G. Sansone Bazzano and R. M. Reisner, "Steroid pathways in sebaceous glands," *J. Invest. Dermatol.*, vol. 62, no.  
650 3, pp. 211–216, 1974, doi: 10.1111/1523-1747.ep12676785.

- 651 [92] S. B. Meroni, M. F. Riera, E. H. Pellizzari, and S. B. Cigorruga, "Regulation of rat sertoli cell function by FSH:  
652 Possible role of phosphatidylinositol 3-kinase/protein kinase B pathway," *J. Endocrinol.*, vol. 174, no. 2, pp. 195–  
653 204, Aug. 2002, doi: 10.1677/joe.0.1740195.
- 654 [93] B. H. Shah, A. J. Baukal, F. B. Shah, and K. J. Catt, "Mechanisms of extracellularly regulated kinases 1/2 activation  
655 in adrenal glomerulosa cells by lysophosphatidic acid and epidermal growth factor," *Mol. Endocrinol.*, vol. 19,  
656 no. 10, pp. 2535–2548, Oct. 2005, doi: 10.1210/me.2005-0082.
- 657 [94] M. Rábano *et al.*, "Sphingosine-1-phosphate stimulates cortisol secretion," in *FEBS Letters*, Jan. 2003, vol. 535, no.  
658 1–3, pp. 101–105, doi: 10.1016/S0014-5793(02)03882-6.
- 659 [95] L. Brizuela *et al.*, "Sphingosine 1-phosphate: A novel stimulator of aldosterone secretion," *J. Lipid Res.*, vol. 47,  
660 no. 6, pp. 1238–1249, Jun. 2006, doi: 10.1194/jlr.M500510-JLR200.
- 661 [96] R. W. Ledeen and G. Wu, "Sphingolipids of the nucleus and their role in nuclear signaling," *Biochimica et*  
662 *Biophysica Acta - Molecular and Cell Biology of Lipids*, vol. 1761, no. 5–6. Biochim Biophys Acta, pp. 588–598, May  
663 2006, doi: 10.1016/j.bbalip.2006.04.010.
- 664 [97] S. Hamanaka, M. Hara, H. Nishio, F. Otsuka, A. Suzuki, and Y. Uchida, "Human epidermal glucosylceramides  
665 are major precursors of stratum corneum ceramides," *J. Invest. Dermatol.*, vol. 119, no. 2, pp. 416–423, 2002, doi:  
666 10.1046/j.1523-1747.2002.01836.x.
- 667 [98] B. Breiden and K. Sandhoff, "The role of sphingolipid metabolism in cutaneous permeability barrier formation,"  
668 *Biochimica et Biophysica Acta - Molecular and Cell Biology of Lipids*, vol. 1841, no. 3. Biochim Biophys Acta, pp. 441–  
669 452, Mar. 2014, doi: 10.1016/j.bbalip.2013.08.010.
- 670 [99] T. Stuart *et al.*, "Comprehensive Integration of Single-Cell Data," *Cell*, vol. 177, no. 7, pp. 1888–1902.e21, Jun. 2019,  
671 doi: 10.1016/j.cell.2019.05.031.
- 672 [100] A. Butler, P. Hoffman, P. Smibert, E. Papalexi, and R. Satija, "Integrating single-cell transcriptomic data across  
673 different conditions, technologies, and species," *Nat. Biotechnol.*, vol. 36, no. 5, pp. 411–420, Jun. 2018, doi:  
674 10.1038/nbt.4096.
- 675 [101] S. Freytag, L. Tian, I. Lönnstedt, M. Ng, and M. Bahlo, "Comparison of clustering tools in R for medium-sized  
676 10x Genomics single-cell RNA-sequencing data," *F1000Research*, vol. 7, p. 1297, 2018, doi:  
677 10.12688/f1000research.15809.2.
- 678 [102] Y. Hao *et al.*, "Integrated analysis of multimodal single-cell data," *Cell*, vol. 184, no. 13, pp. 3573–3587.e29, Jun.  
679 2021, doi: 10.1016/j.cell.2021.04.048.
- 680 [103] Y. Zhou *et al.*, "Metascape provides a biologist-oriented resource for the analysis of systems-level datasets," *Nat.*  
681 *Commun.*, vol. 10, no. 1, Dec. 2019, doi: 10.1038/s41467-019-09234-6.

682

683
